# Supplementary material for: The promising indicators of the thermal and mechanical properties of collagen from bass and tilapia: synergistic effects of hydroxyproline and cysteine
Source: Royal Society of Chemistry journal article supplement (doi:10.1039/c8bm00675j), 2018-01-01
Supplement: c8bm00675j1.pdf [file c8bm00675j1.pdf]

## ELECTRONIC SUPPLEMENTARY INFORMATION

### The promising indicators for thermal and mechanical properties of collagen from bass and tilapia: Synergistic effect of hydroxyproline and cysteine

Zixian Bao,<sup>‡</sup> Yue Sun,<sup>‡</sup> Kamal Rai, Xinying Peng, Shilu Wang, Rui Nian\* and Mo Xian\*

CAS Key Laboratory of Biobased Materials, Qingdao Institute of Bioenergy and Bioprocess Technology, Chinese Academy of Sciences, No. 189 Songling Road, Qingdao 266101, China.

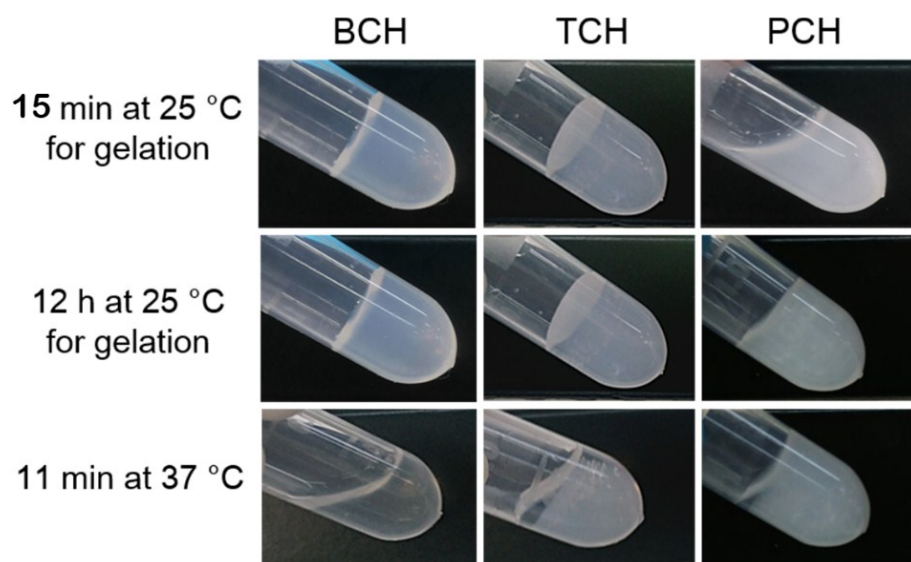

**Fig. S1** The photos of different collagen hydrogels (bass, tilapia and pig, 0.5 mL) kept at 25 °C after neutralization for 15 min and 12 h, and then incubated at 37 °C for 11 min.

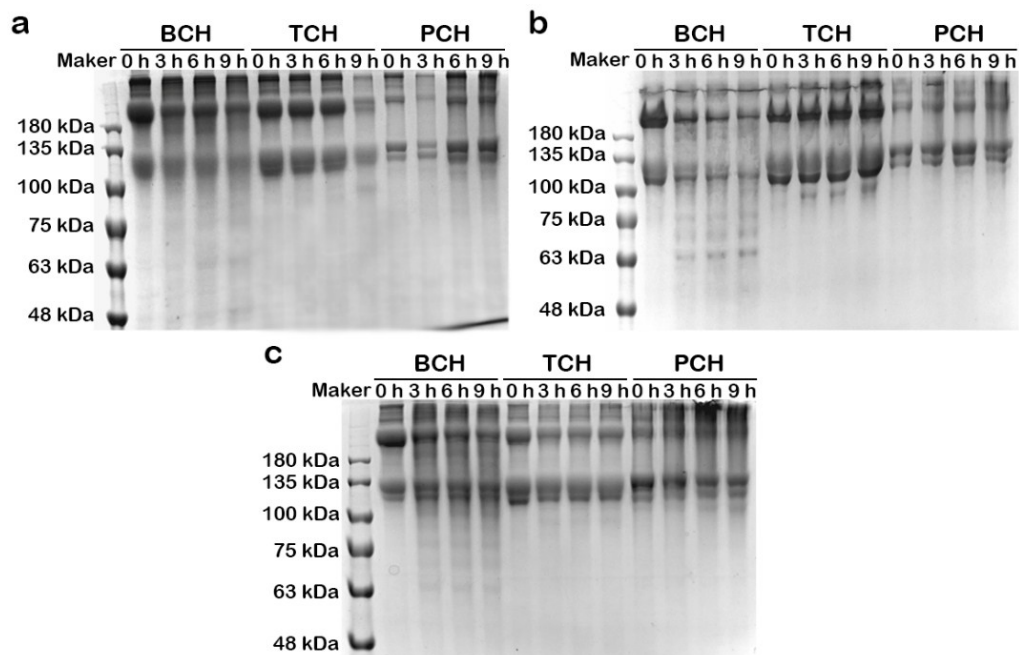

**Fig. S2** Electrophoretic patterns of BCH, TCH and PCH incubated at (a) 30 °C, (b) 42 °C, (c) 50 °C for 0 h, 3 h, 6 h and 9 h.

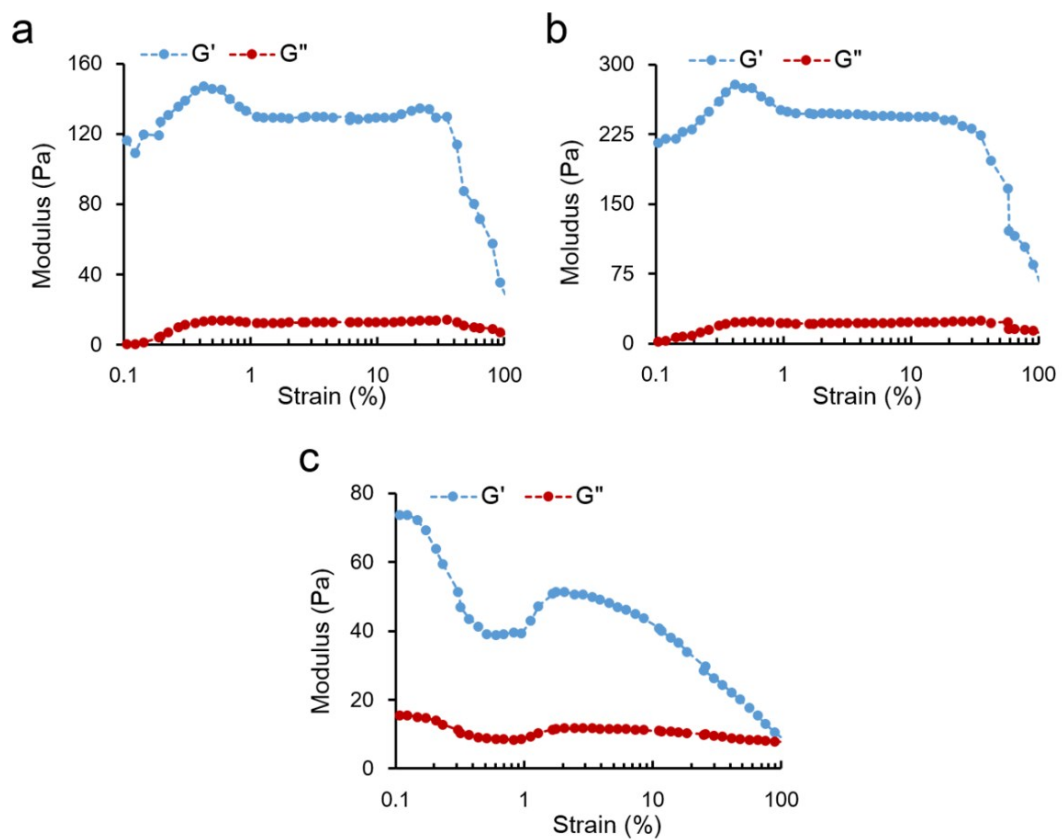

**Fig. S3** Strain-dependent oscillatory shear rheology of the collagen hydrogels. a) BCH, b) TCH, c) PCH.

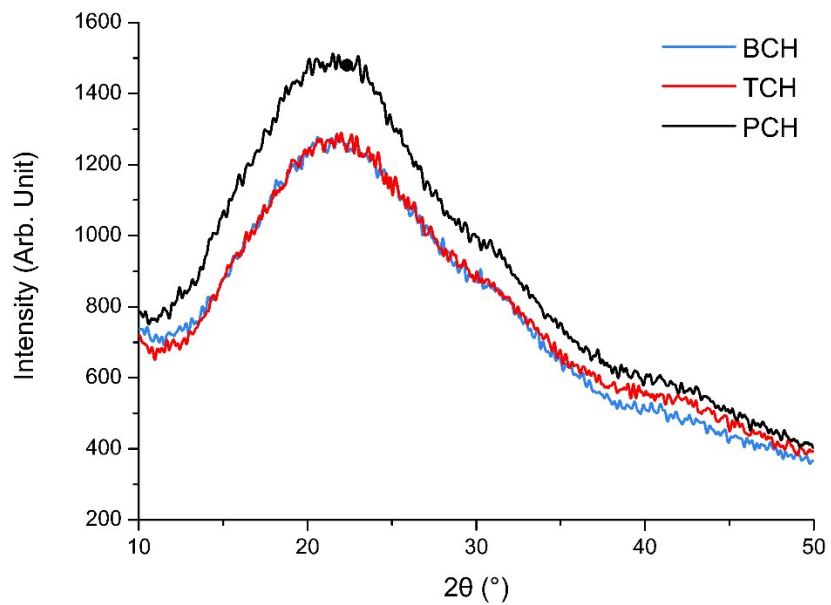

**Fig. S4** XRD patterns of freeze-dried BCH, TCH and PCH samples.

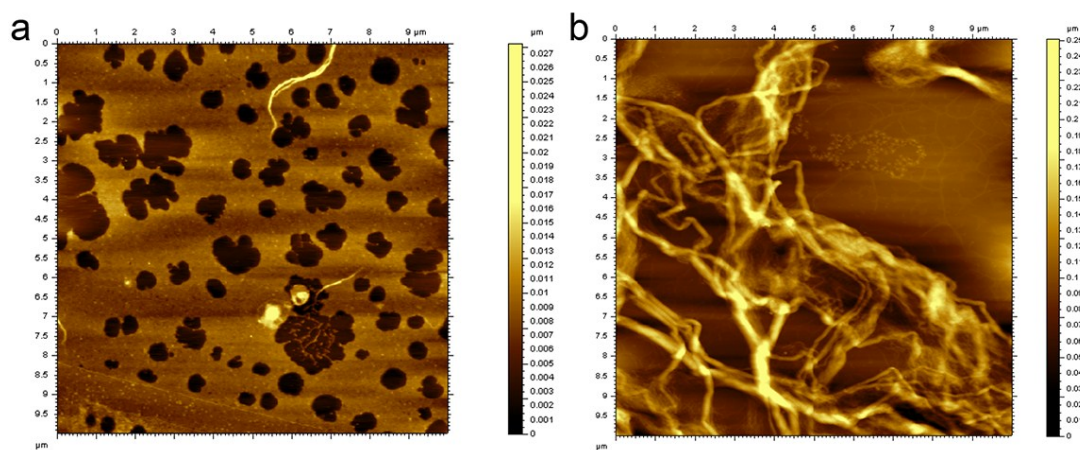

**Fig. S5** AFM observation of the self-assembly of different collagen samples. (a) TC, (b) PC.

**Table S1** List of denaturing temperature and hydroxyproline content of extracted COL-I from different species.

| Class    | Species               | Source              | Hydroxyproline content (g/1000 g protein) | Denaturing temperature (°C) | Ref.      |    |
|----------|-----------------------|---------------------|-------------------------------------------|-----------------------------|-----------|----|
| Mammalia | Calf                  | Skin                | 94                                        | 40.8                        | 60        |    |
|          | Pig                   | Skin                | 136                                       | 37.1                        | This work |    |
| Amphibia | Frog                  | Skin                | 76                                        | 31.5                        | 60        |    |
| Reptilia | Soft-shelled turtle   | Skin                | 78                                        | 36.0                        | 53        |    |
|          |                       | Calipash            | 108.4                                     | 35.1                        | 54        |    |
| Fish     | Carp                  | Skin                | 84                                        | 31.7                        | 28        |    |
|          | Eel                   | Skin                | 74                                        | 29.3                        |           |    |
|          | Common mackerel       | Skin                | 72                                        | 26.1                        | 29        |    |
|          | Saury                 | Skin                | 70                                        | 23.0                        |           |    |
|          | Chum salmon           | Skin                | 63                                        | 19.4                        |           |    |
|          | Skipjack              | Bone                | —                                         | 29.7                        |           |    |
|          | Ayu                   | Bone                | —                                         | 29.7                        |           |    |
|          | Yellow sea bream      | Bone                | —                                         | 29.5                        |           |    |
|          | Horse mackerel        | Bone                | —                                         | 29.5                        |           |    |
|          | Ocellate pufferfish   | Skin                | 67                                        | 28.0                        |           | 41 |
|          | Alaska pollack        | Skin                | 55                                        | 16.8                        |           | 42 |
|          |                       | Swim bladder        | 52                                        | 18.4                        |           |    |
|          |                       | Sardine             | Scale                                     | 86                          | 28.5      | 43 |
|          |                       | Red sea bream       | Scale                                     | 87                          | 28.0      |    |
|          |                       | Bigeye snapper      | Skin                                      | 77                          | 31.0      | 44 |
|          |                       |                     | Bone                                      | 68                          | 31.5      |    |
|          |                       | Lizard fish         | Scale                                     | 68                          | 27.6      | 45 |
|          |                       | Horse mackerel      | scale                                     | 71                          | 28.1      |    |
|          |                       | Grey mullet         | Scale                                     | 67                          | 27.1      |    |
|          |                       | Flying fish         | Scale                                     | 73                          | 29.2      |    |
|          |                       | Yellowback seabream | Scalle                                    | 65                          | 28.2      |    |
|          |                       | Pacific saury       | Scale                                     | 13.3                        | 24.5      | 46 |
|          |                       | Rohu                | Scale                                     | 83                          | 36.5      | 47 |
|          | Catla                 | Scale               | 84                                        | 36.5                        | 47        |    |
|          | Silver carp           | Skin                | 84                                        | 34.5                        | 48        |    |
|          | Brown backed toadfish | Skin                | 77                                        | 28.0                        | 49        |    |
|          | Deep-sea redfish      | Skin                | 64                                        | 16.1                        | 50        |    |

|                        |                                                    |           |     |      |        |
|------------------------|----------------------------------------------------|-----------|-----|------|--------|
|                        |                                                    | Scale     | 65  | 17.7 |        |
|                        |                                                    | Bone      | 61  | 17.5 |        |
|                        | Batilic Cod                                        | Skin      | 53  | 15.0 | 51     |
|                        | Giant snakehead                                    | Scale     | —   | 52.8 | 61     |
|                        | Brownbanded bamboo shark                           | Cartilage | 94  | 35.9 | 58     |
|                        | Blacktip shark                                     | Cartilage | 91  | 34.5 |        |
| Other classes from sea | Rhizostomous jellyfish                             | Mesoglea  | 38  | 28.8 | 52, 59 |
|                        | Sea cucumber ( <i>Holothuria parva</i> )           | Skin      | 62  | 32.5 | 55     |
|                        | Sea cucumber ( <i>Stichopus monotuberculatus</i> ) | Body wall | 67  | 30.2 | 56     |
|                        | Squid                                              | Skin      | 101 | 34.8 | 57     |

## References

28. S. Kimura, X. P. Zhu, R. Matsui, M. Shijoh and S. Takamizawa, *J. Food Sci.*, 1988, **53**, 1315-1318.
29. T. Nagai and N. Suzuki, *Food Chem.*, 2000, **68**, 277-281.
41. T. Nagai, Y. Araki and N. Suzuki, *Food Chem.*, 2002, **78**, 173-177.
42. S. Kimura and Y. Ohno, *Comparative Biochemistry and Physiology Part B: Comparative Biochemistry*, 1987, **88**, 409-413.
43. T. Nagai, M. Izumi and M. Ishii, *Int. J. Food Sci. Tech.*, 2004, **39**, 239-244.
44. P. Kittiphattanabawon, S. Benjakul, W. Visessanguan, T. Nagai and M. Tanaka, *Food Chem.*, 2005, **89**, 363-372.
45. E. Okazaki and K. Osako, *Food Chem.*, 2014, **149**, 264-270.
46. H. Mori, Y. Tone, K. Shimizu, K. Zikihara, S. Tokutomi, T. Ida, H. Ihara and M. Hara, *Materials Science and Engineering: C*, 2013, **33**, 174-181.
47. F. Pati, B. Adhikari and S. Dhara, *Bioresour. Technol.*, 2010, **101**, 3737-3742.
48. S. Rodziewicz-Motowidło, A. Śladewska, E. Mulkiwicz, A. Kołodziejczyk, A. Aleksandrowicz, J. Miskiewicz and P. Stepnowski, *Aquaculture*, 2008, **285**, 130-134.
49. L. S. Senaratne, P.-J. Park and S.-K. Kim, *Bioresour. Technol.*, 2006, **97**, 191-197.
50. L. Wang, X. An, F. Yang, Z. Xin, L. Zhao and Q. Hu, *Food Chem.*, 2008, **108**, 616-623.
51. M. Sadowska, I. Kołodziejska and C. Niecikowska, *Food Chem.*, 2003, **81**, 257-262.
52. T. Nagai, W. Worawattanamateekul, N. Suzuki, T. Nakamura, T. Ito, K. Fujiki, M. Nakao and T. Yano, *Food Chem.*, 2000, **70**, 205-208.
53. N. Nagai, H. Kobayashi, S. Katayama and M. Munekata, *J. Biomat. Sci.-Polym. E.*, 2009, **20**, 567-576.
54. Y. n. Yang, C. Li, W. Song, W. Wang and G. Qian, *Int. J. Biol. Macromol.*, 2016, **89**, 344-352.
55. N. Adibzadeh, S. Aminzadeh, S. Jamili, A. A. Karkhane and N. Farrokhi, *Appl. Biochem. Biotechnol.*, 2014, **173**, 143-154.
56. M. Zhong, T. Chen, C. Hu and C. Ren, *J. Food Sci.*, 2015, **80**, C671-C679.

57. A. Veeruraj, M. Arumugam, T. Ajithkumar and T. Balasubramanian, *Food Hydrocolloid.*, 2015, **43**, 708-716.
58. P. Kittiphattanabawon, S. Benjakul, W. Visessanguan and F. Shahidi, *LWT - Food Sci. Technol.*, 2010, **43**, 792-800.
59. J. Zhang, R. Duan, L. Huang, Y. Song and J. M. Regenstein, *Food Chem.*, 2014, **150**, 22-26.
60. J. Zhang and R. Duan, *Int. J. Biol. Macromol.*, 2017, **101**, 638-642.
61. J. K. Wang, K. P. Yeo, Y. Y. Chun, T. T. Y. Tan, N. S. Tan, V. Angeli and C. Choong, *Acta Biomater.*, 2017, **63**, 246-260.
